# Supplementary material
Source: MDPI journal article supplement (https://www.mdpi.com/2073-4360/7/6/1088)
Supplement: s1 [file s1]

## Supplementary

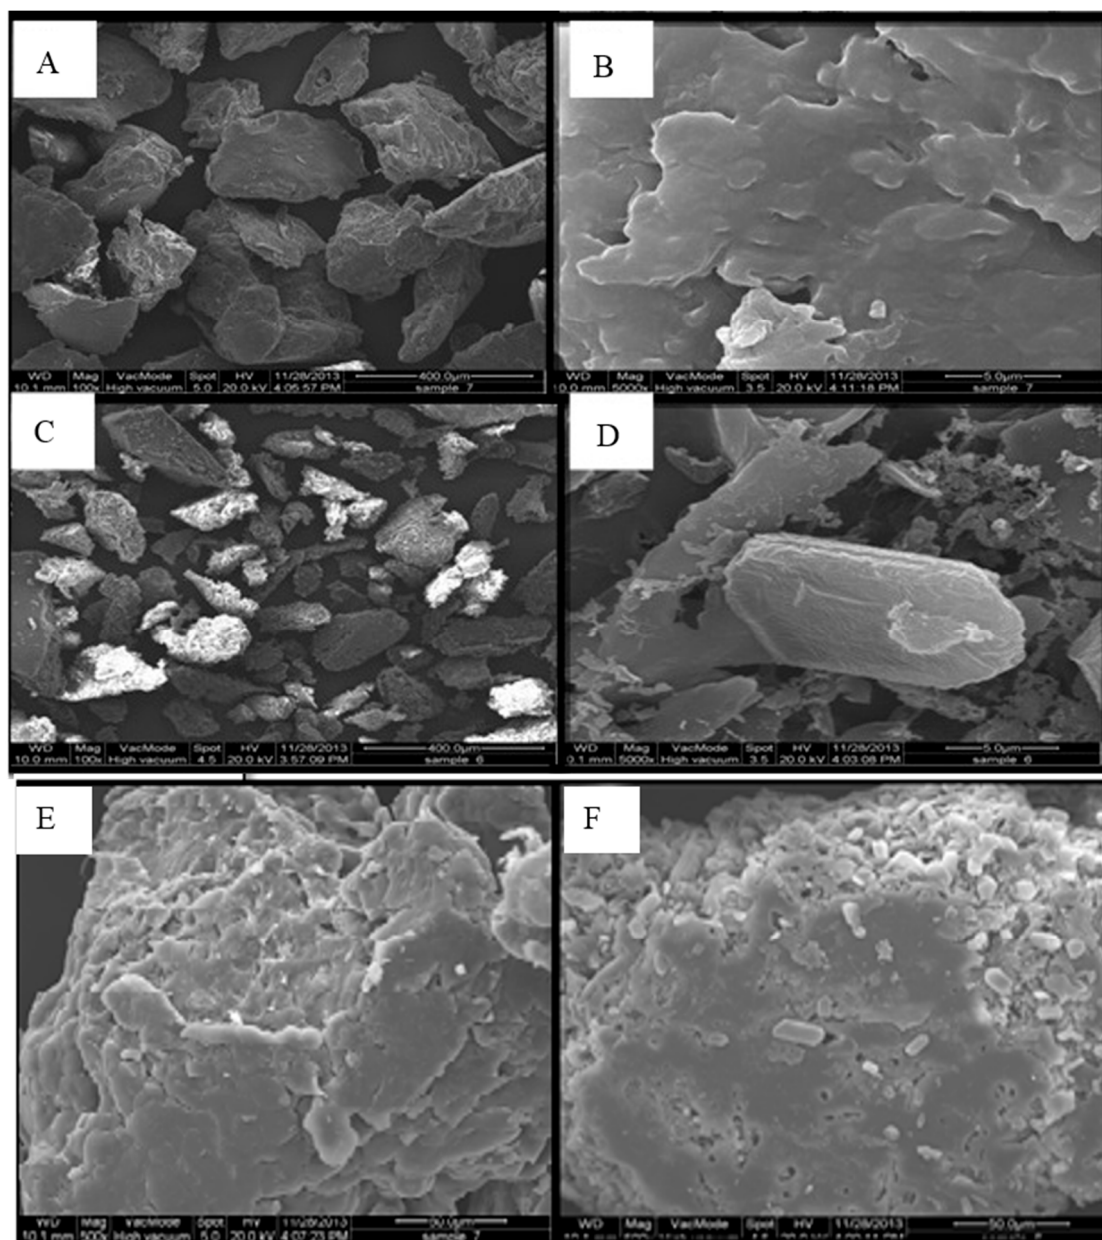

**Figure S1.** The figure shows the FESEM of unloaded (A,B) and 56% w/w m-INN loaded complex coacervate (C,D). Picture also showing the surface of unloaded (E) and m-INN loaded coacervates (F). Ibuprofen crystals are seen on the surface of drug loaded microcapsules (F).

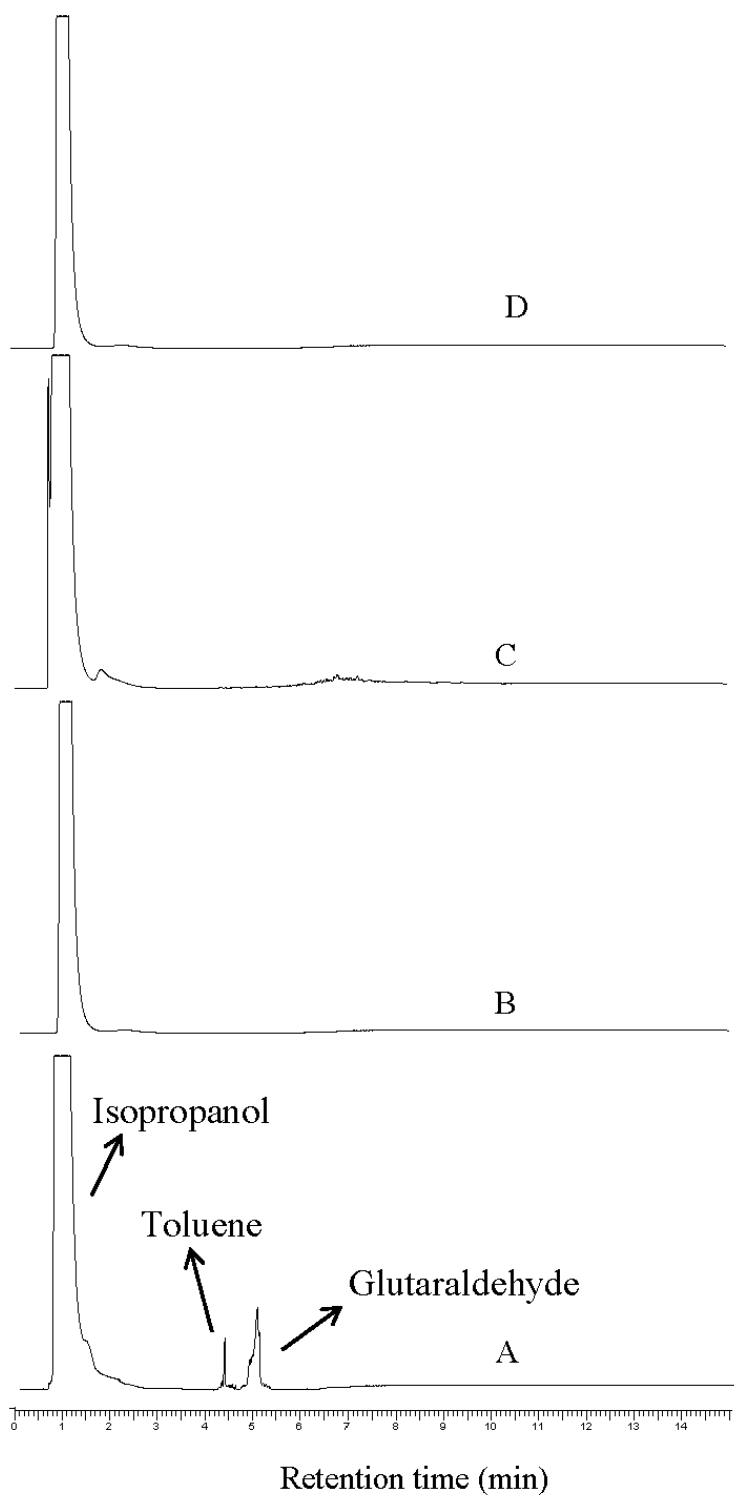

**Figure S2.** Gas chromatogram showing toluene and glutaraldehyde peak along with isopropanol (A), toluene saturated with glutaraldehyde in 1:1 ratio with the Propan-2-al solvent). The peaks of toluene and glutaraldehyde were absent in microcapsules prepared with 30 (B), 20 (C) and 10 (D) mL of toluene saturated with glutaraldehyde.

**Table S1.** Influence of different cross-linking agent on release kinetics and mechanism of 30% w/w m-INN CMSP-gelatin microcapsules.

| Cross-Linking/<br>Kinetic Model | 10 mL<br>GST | 10 mL<br>GST + AlCl <sub>3</sub> | 20 mL<br>GST | 20 mL<br>GST + AlCl <sub>3</sub> | 30 mL<br>GST | 30 mL<br>GST + AlCl <sub>3</sub> |
|---------------------------------|--------------|----------------------------------|--------------|----------------------------------|--------------|----------------------------------|
| Zero order ( <i>R</i> )         | 0.2449       | 0.5056                           | 0.6098       | 0.6595                           | 0.7273       | 0.7567                           |
| First order ( <i>R</i> )        | 0.9672       | 0.9759                           | 0.9831       | 0.9025                           | 0.9165       | 0.9277                           |
| Higuchi ( <i>R</i> )            | 0.9076       | 0.9573                           | 0.9714       | 0.9659                           | 0.9672       | 0.9795                           |
| Korsmeyer-Peppas ( <i>R</i> )   | 0.9948       | 0.9828                           | 0.9876       | 0.9883                           | 0.9811       | 0.9889                           |
| Release exponent ( <i>n</i> )   | 0.2257       | 0.2889                           | 0.3193       | 0.3347                           | 0.3541       | 0.3901                           |
| Release mechanism               | Fickian      | Fickian                          | Fickian      | Fickian                          | Fickian      | Fickian                          |

**Table S2.** Influence of different drug loading on the release kinetics and mechanism of m-INN loaded CMSP-gelatin microcapsules cross-linked with 10 mL of GST.

| Ibuprofen Loading/Kinetic Model | 30% w/w | 45% w/w | 56% w/w |
|---------------------------------|---------|---------|---------|
| Zero order ( <i>R</i> )         | 0.2449  | 0.7488  | 0.8139  |
| First order ( <i>R</i> )        | 0.9672  | 0.9379  | 0.9856  |
| Higuchi ( <i>R</i> )            | 0.9076  | 0.9604  | 0.9713  |
| Korsmeyer-Peppas ( <i>R</i> )   | 0.9948  | 0.9577  | 1.0000  |
| Release exponent ( <i>n</i> )   | 0.2257  | 0.2087  | 0.2015  |
| Release mechanism               | Fickian | Fickian | Fickian |
